# Supplementary material for: Protein Supplementation Enhances the Effects of Intermittent Loading on Skeletal Muscles by Activating the mTORC1 Signaling Pathway in a Rat Model of Disuse Atrophy
Source: MDPI journal article supplement (doi:10.3390/nu12092729), 2020-09-07
Supplement: s1 [file s1]

## Supplementary Materials

**Table 1.** Absolute and relative skeletal muscle mass.

|                                         | CON          | HU             | HU+HP        |
|-----------------------------------------|--------------|----------------|--------------|
| Soleus muscle (mg)                      | 78.7 ± 4.1   | 41.8 ± 2.5 *   | 43.8 ± 0.9   |
| Soleus muscle/body weight (mg/g)        | 0.38 ± 0.02  | 0.22 ± 0.01 *  | 0.23 ± 0.01  |
| Gastrocnemius muscle (mg)               | 950.8 ± 29.0 | 758.8 ± 30.2 * | 785.0 ± 34.9 |
| Gastrocnemius muscle/body weight (mg/g) | 4.6 ± 0.1    | 4.1 ± 0.2 *    | 4.1 ± 0.1    |

Three groups of F344/DuCrI CrIj rats were assigned: control (CON), 14 days of hindlimb unloading (HU), and high-protein oral nutritional supplement (HP) administration during HU (HU + HP). The data shown represent the mean ± SD ( $n = 5-10$ ). \* $p < 0.05$ : compared with CON.
